# Supplementary material for: Large scale free-standing open-ended TiO2 nanotube arrays: stress-induced self-detachment and in situ pore opening
Source: Royal Society of Chemistry journal article supplement (doi:10.1039/c3tc31642d), 2013-01-01
Supplement: c3tc31642d.pdf [file c3tc31642d.pdf]

Electronic Supplementary Information

**Large scale free-standing open-ended TiO<sub>2</sub> nanotube arrays:  
stress-induced self-detachment and *in-situ* pore opening**

Hao Miao Ouyang,<sup>a</sup> Guang Tao Fei,<sup>\*a</sup> Yao Zhang,<sup>a</sup> Hao Su,<sup>b</sup> Zhen Jin,<sup>a</sup> Shao Hui Xu,<sup>a</sup> and Li

De Zhang<sup>a</sup>

<sup>a</sup>Key Laboratory of Materials Physics, and Anhui Key Laboratory of Nanomaterials and Nanostructures, Institute of Solid State Physics, Hefei Institutes of Physical Science, Chinese Academy of Sciences, Hefei, 230031, P. R. China

<sup>b</sup>Department of Metallurgical and Materials Engineering, the University of Alabama, Tuscaloosa, AL, 35401, USA

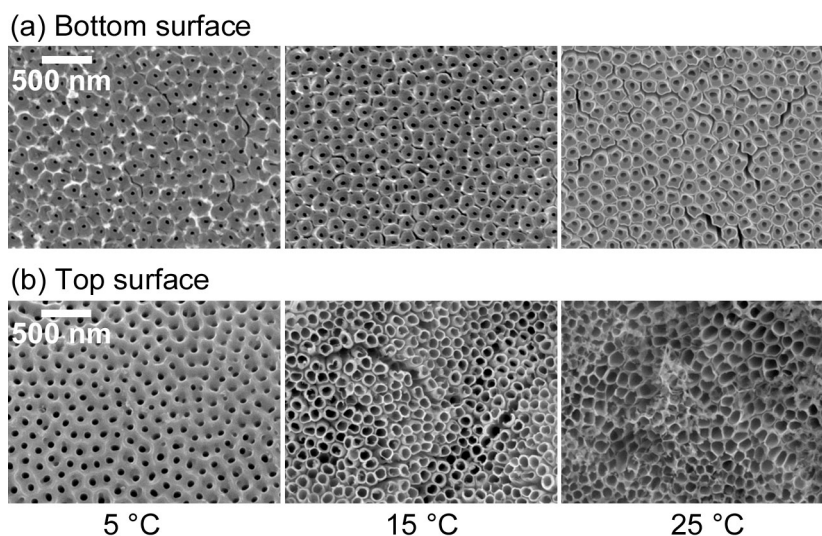

**Fig. S1** (a) Bottom surface and (b) top surface SEM images of TiO<sub>2</sub> nanotube membranes formed at 100 V at different anodization temperature varied from 5 °C to 25 °C.

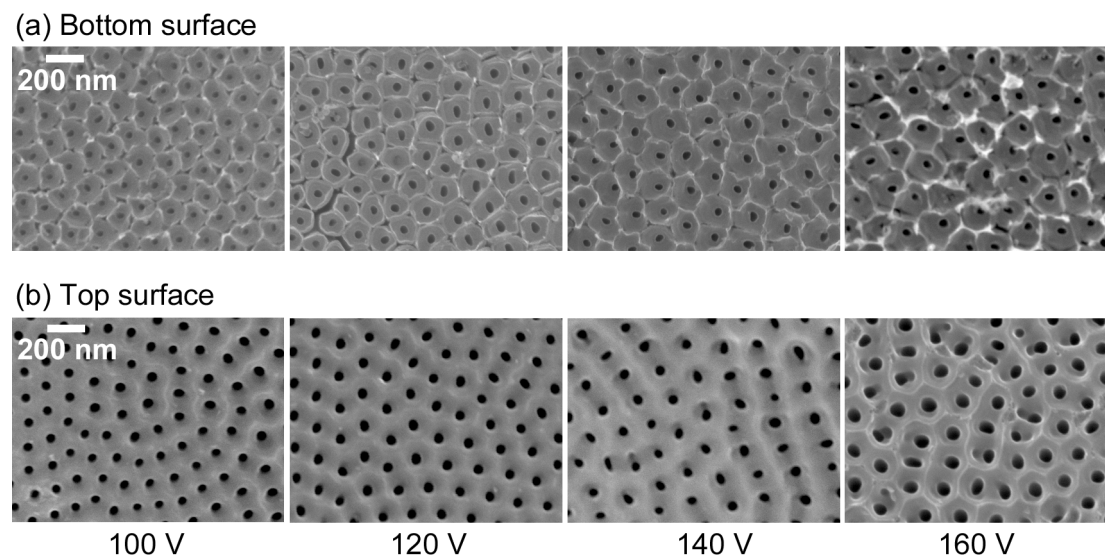

**Fig. S2** (a) Bottom surface and (b) top surface SEM images of TiO<sub>2</sub> nanotube membranes formed in an anodization temperature of 5 °C at different voltages varied from 100 V to 160 V.

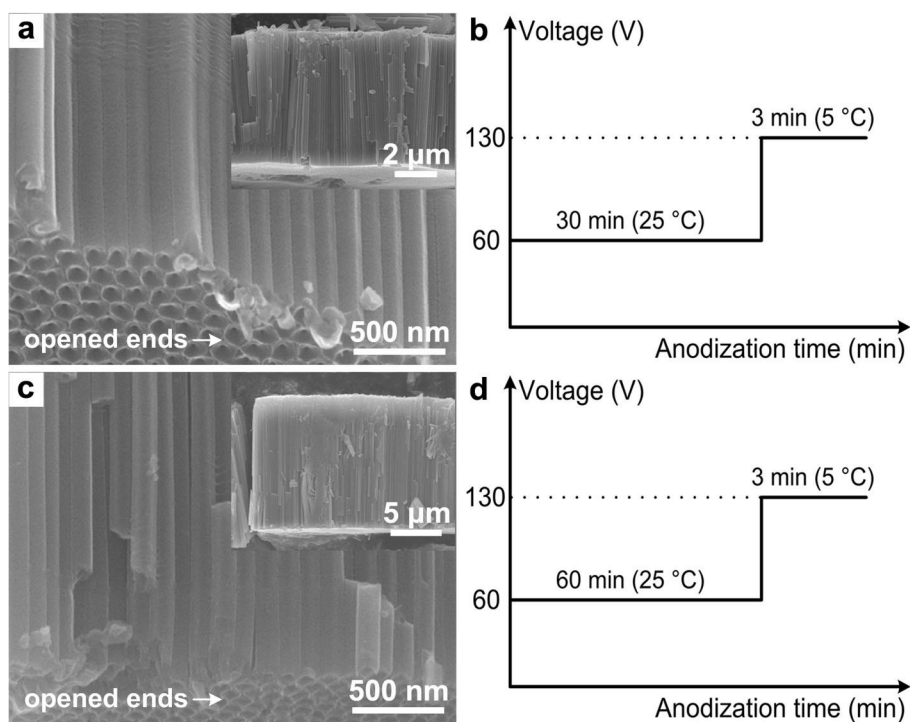

**Fig. S3** Cross-section SEM images and corresponding anodization sequences of TiO<sub>2</sub> nanotube arrays synthesized in EG electrolyte with 0.3 wt% NH<sub>4</sub>F and 2 vol% H<sub>2</sub>O: (a–b) 60 V at 25 °C for 30 min followed by 130 V at 5 °C for 3 min; (c–d) 60 V at 25 °C for 60 min followed by 130 V at 5 °C for 3 min.
